# Supplementary material
Source: bioRxiv or medRxiv preprint supplement (https://www.biorxiv.org/content/biorxiv/early/2018/12/09/491472.1/DC2/embed/media-2.pdf)

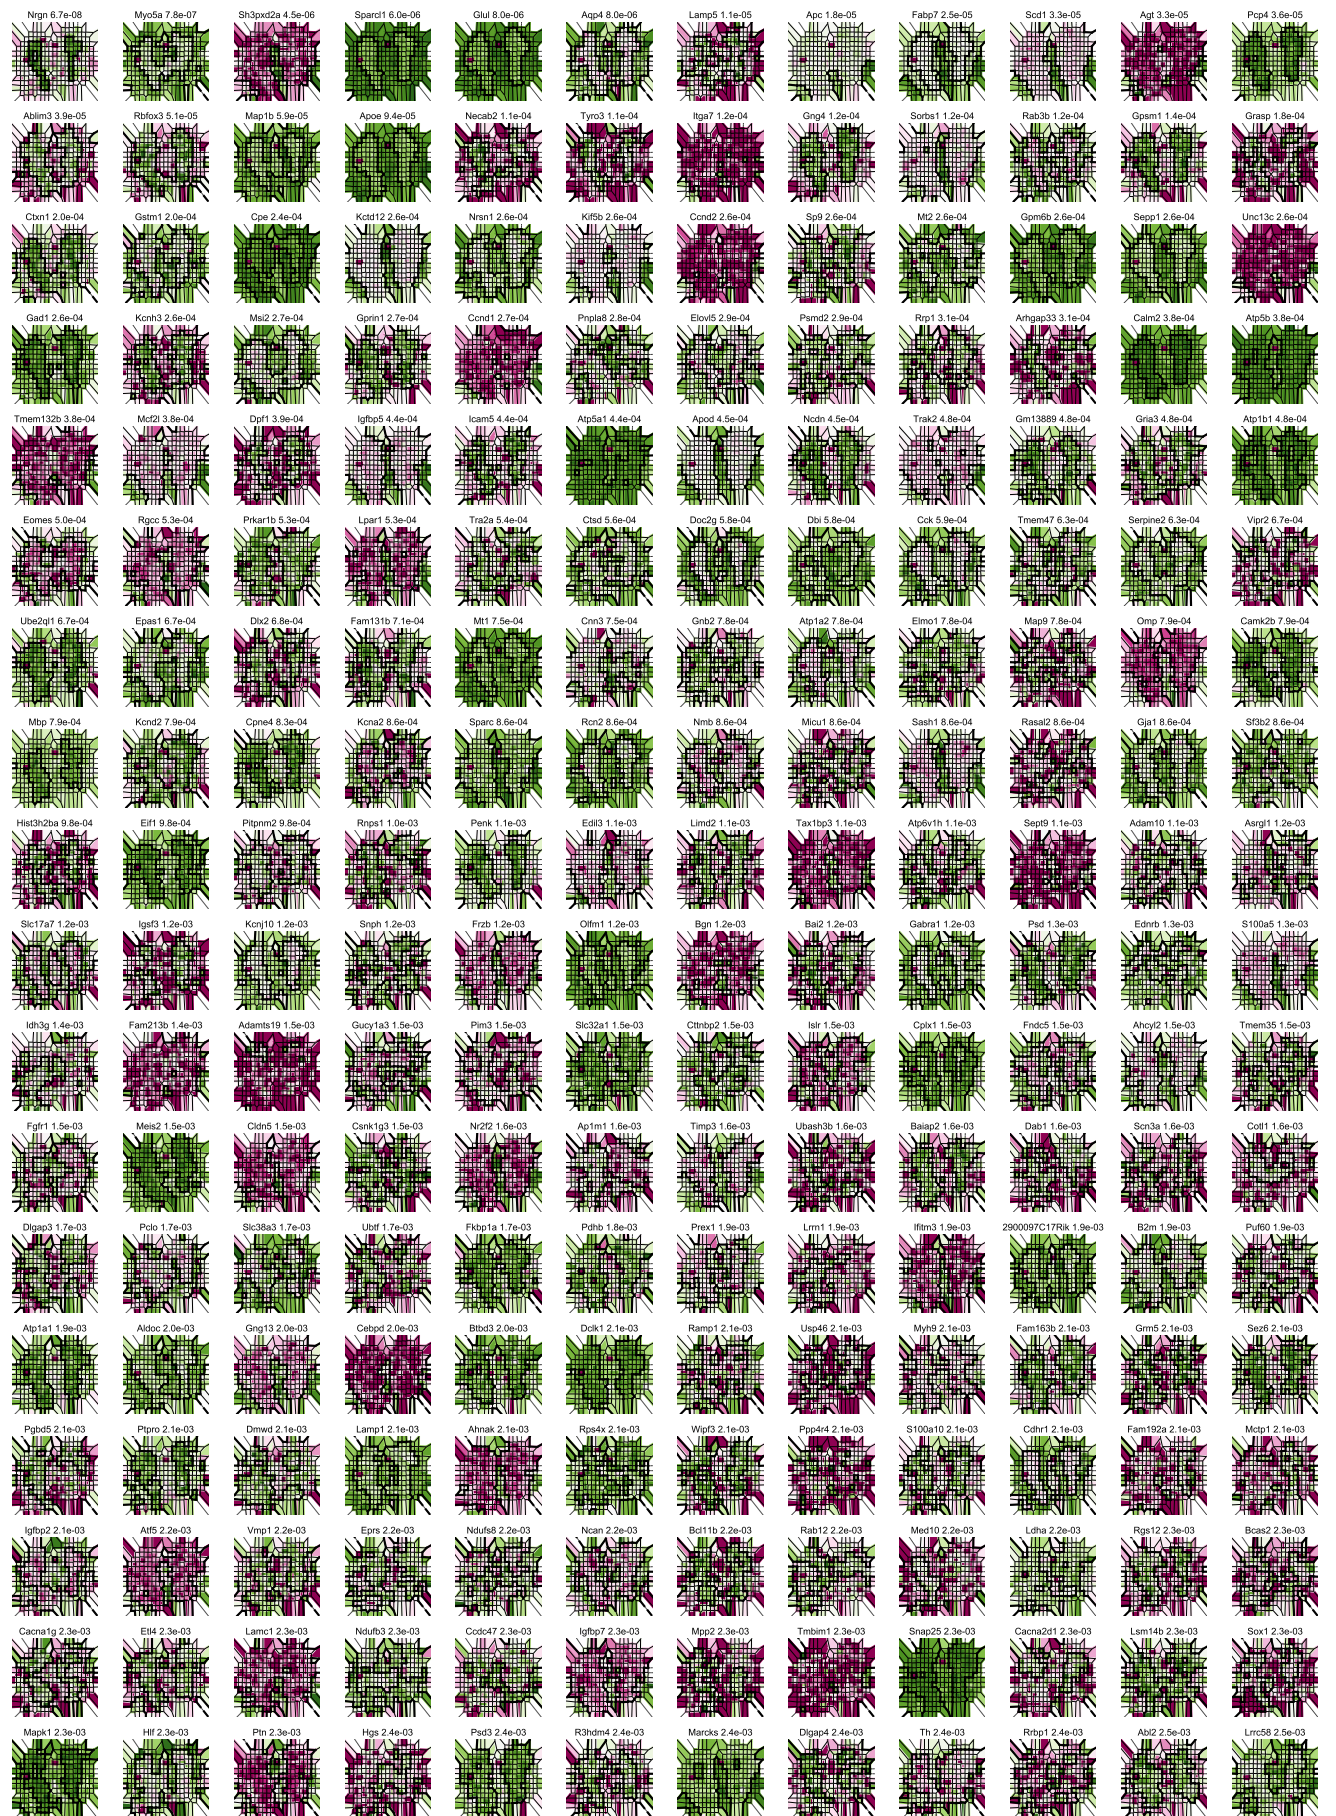

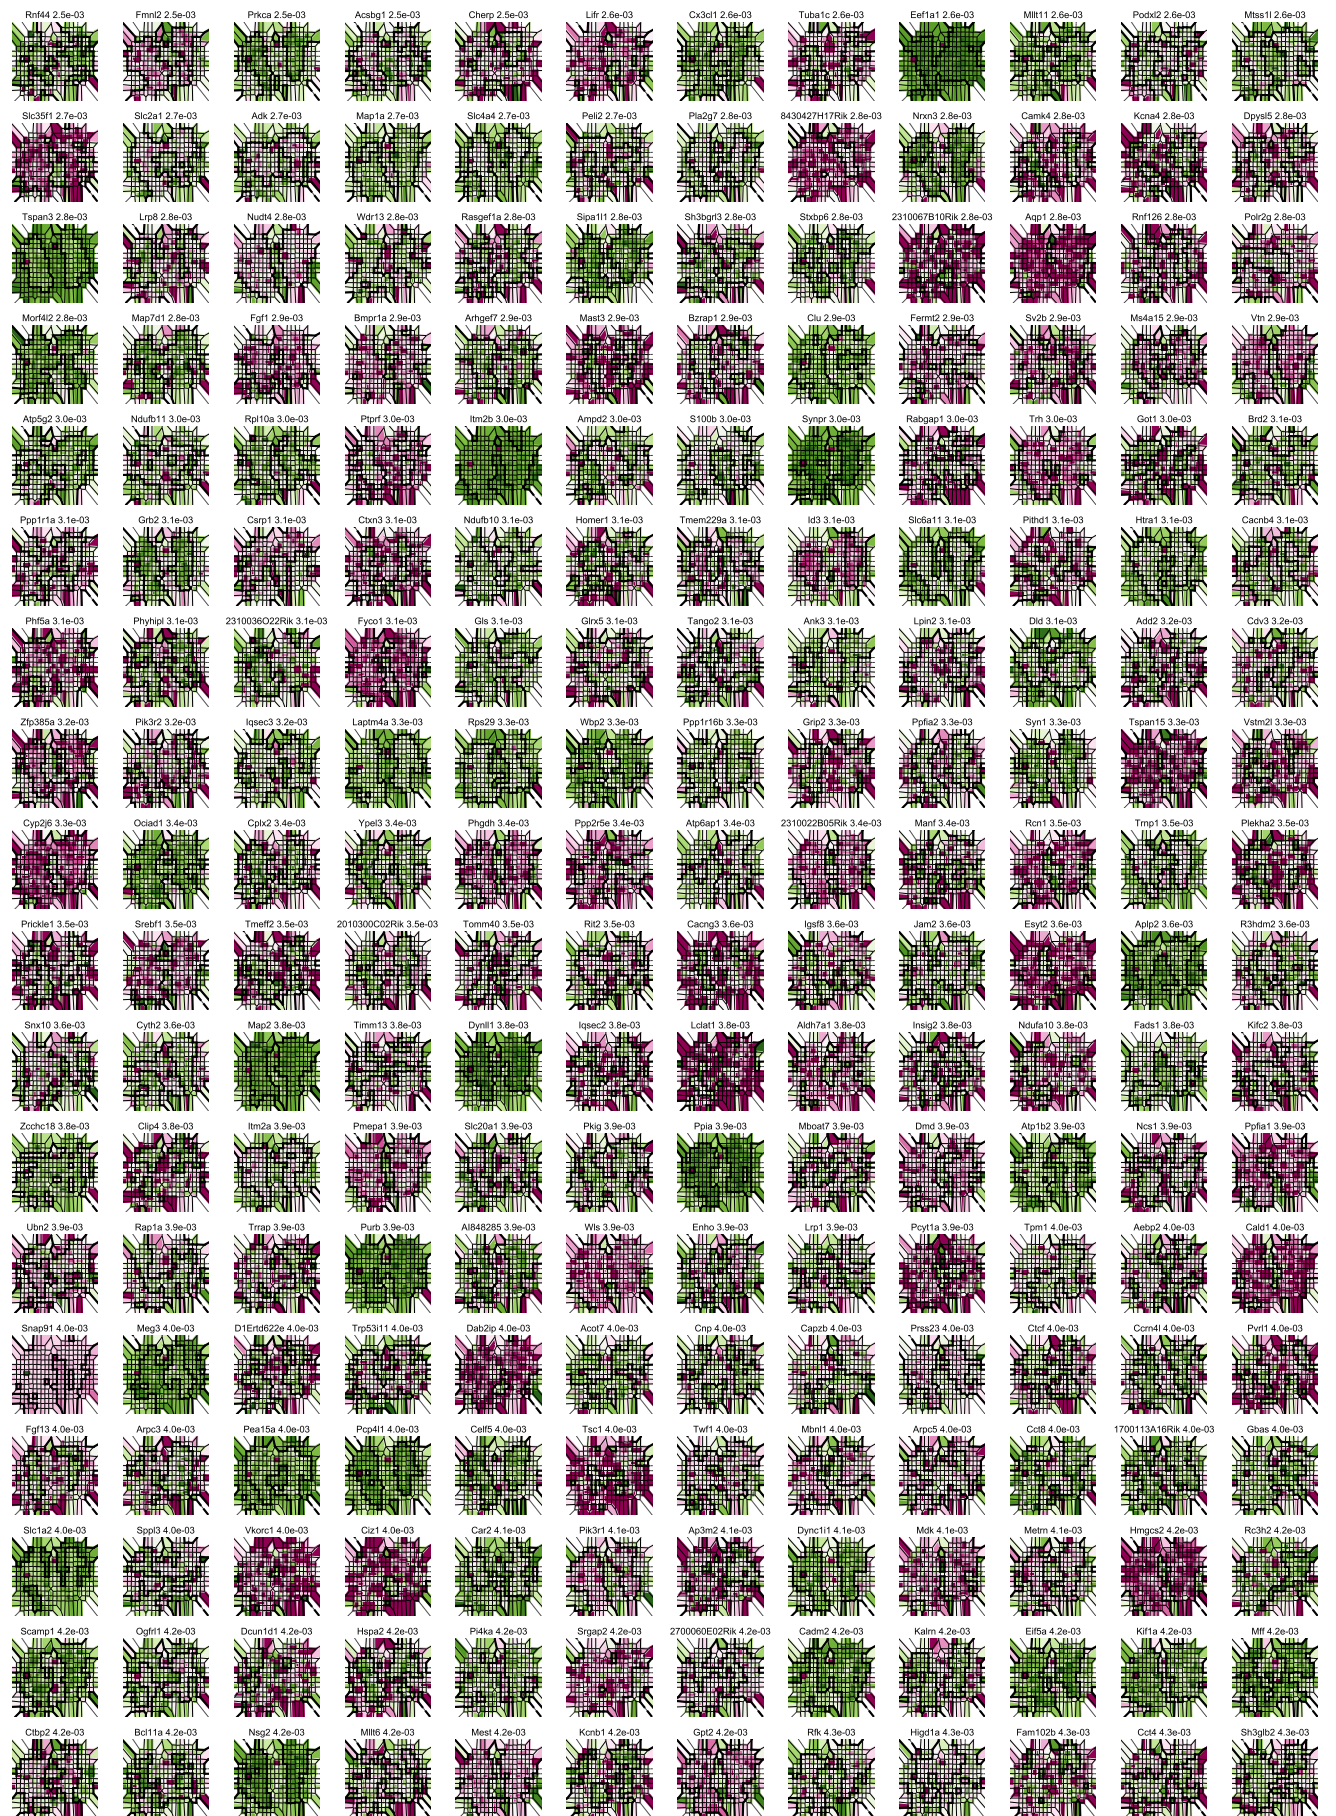

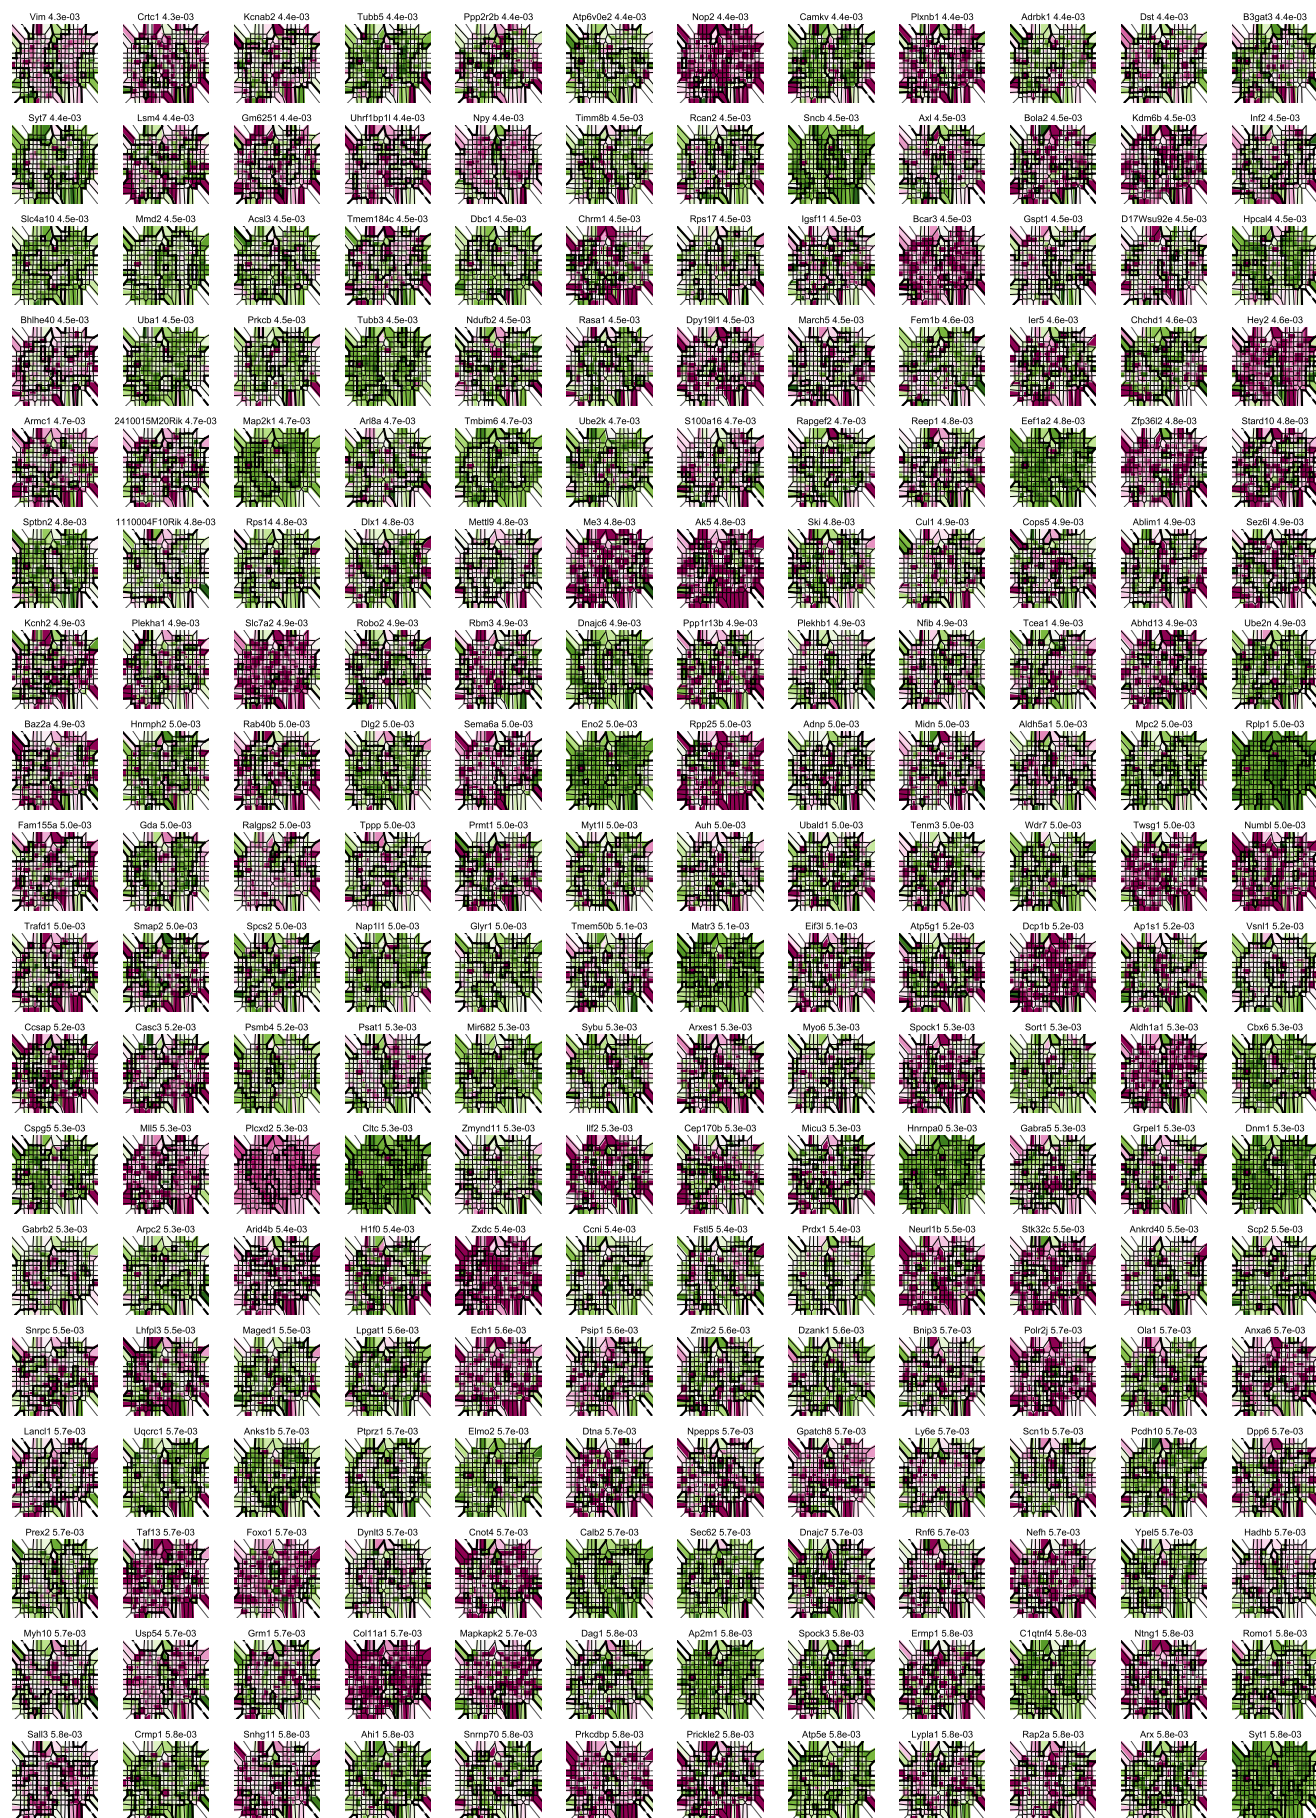

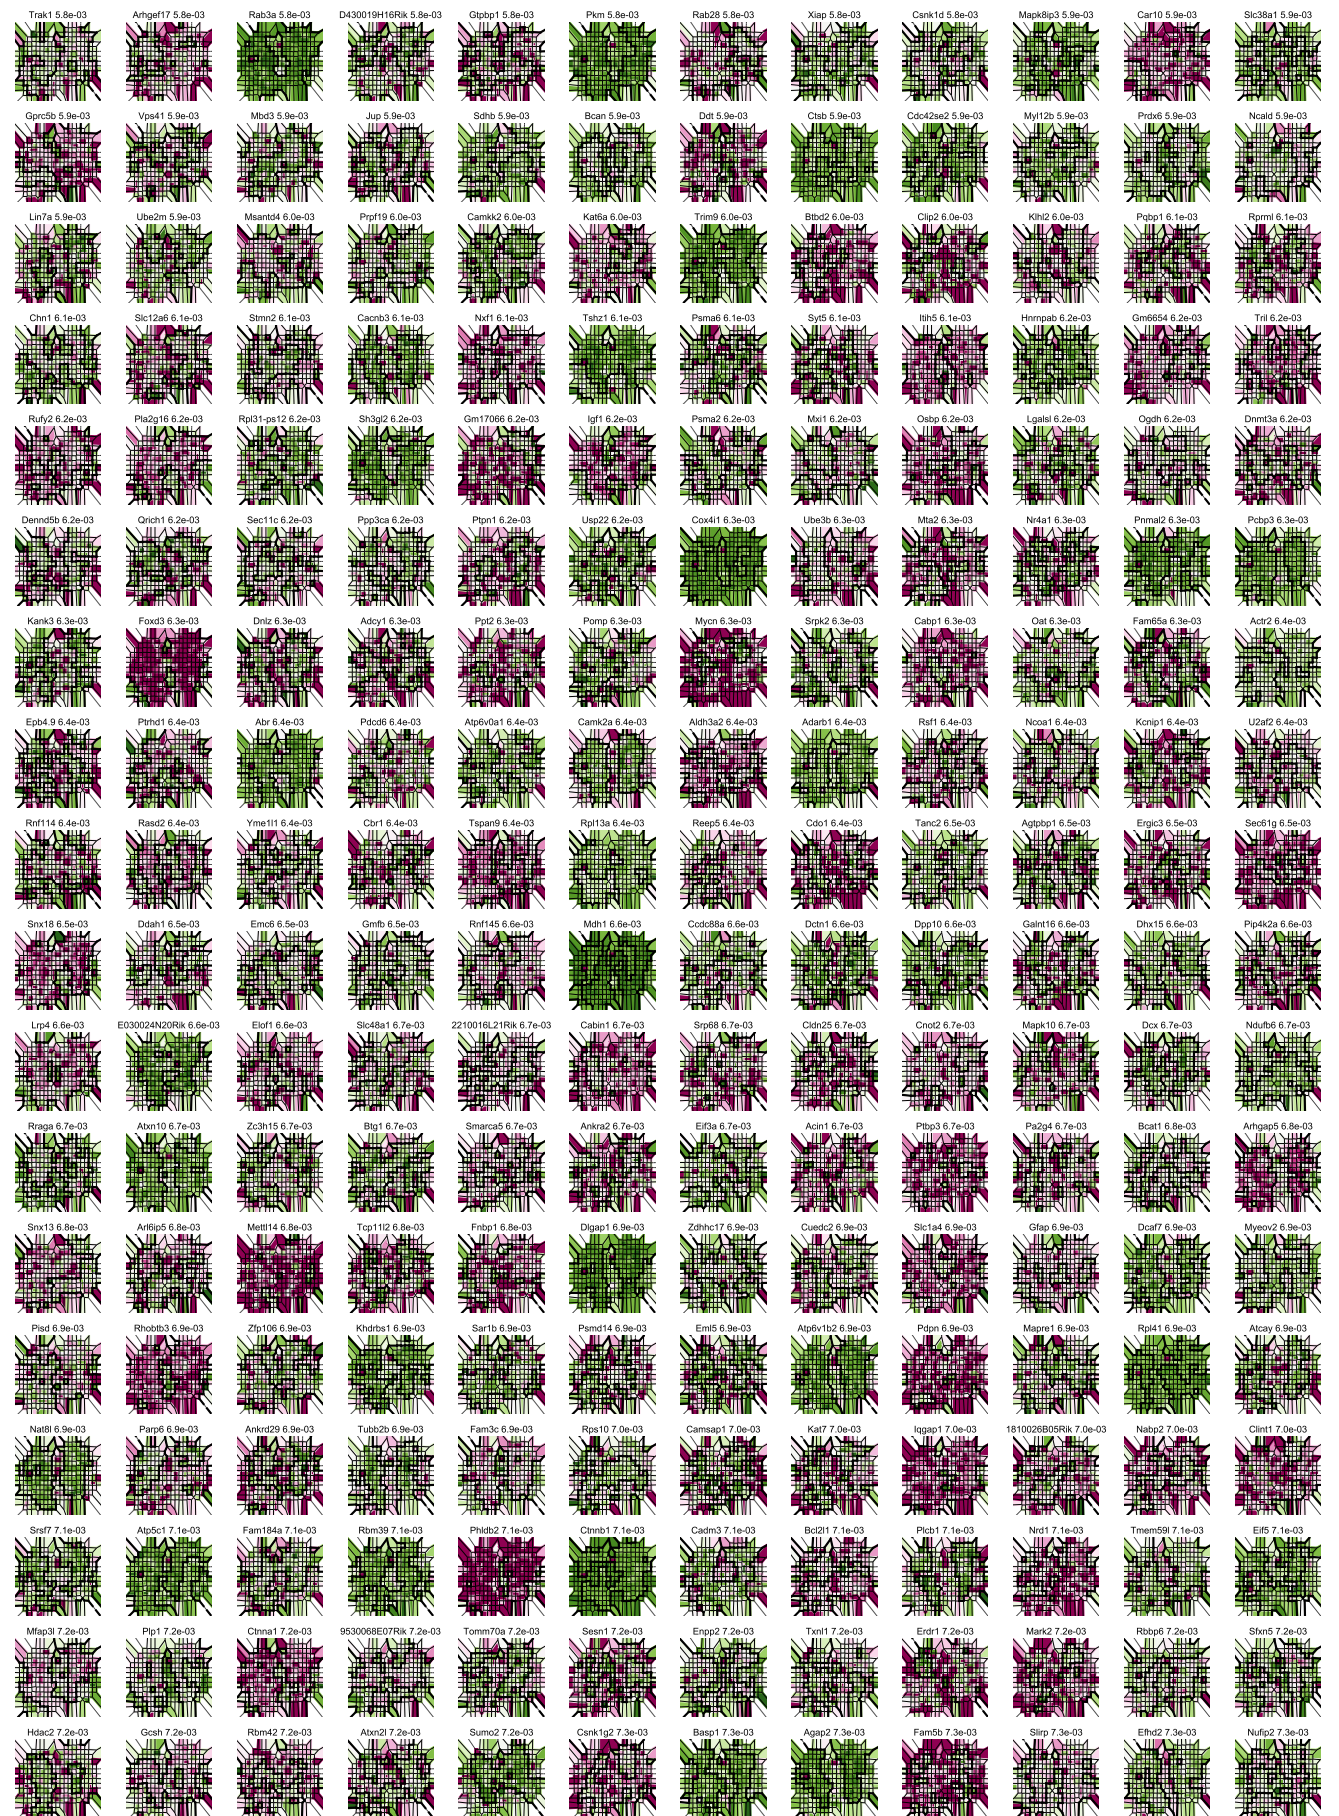

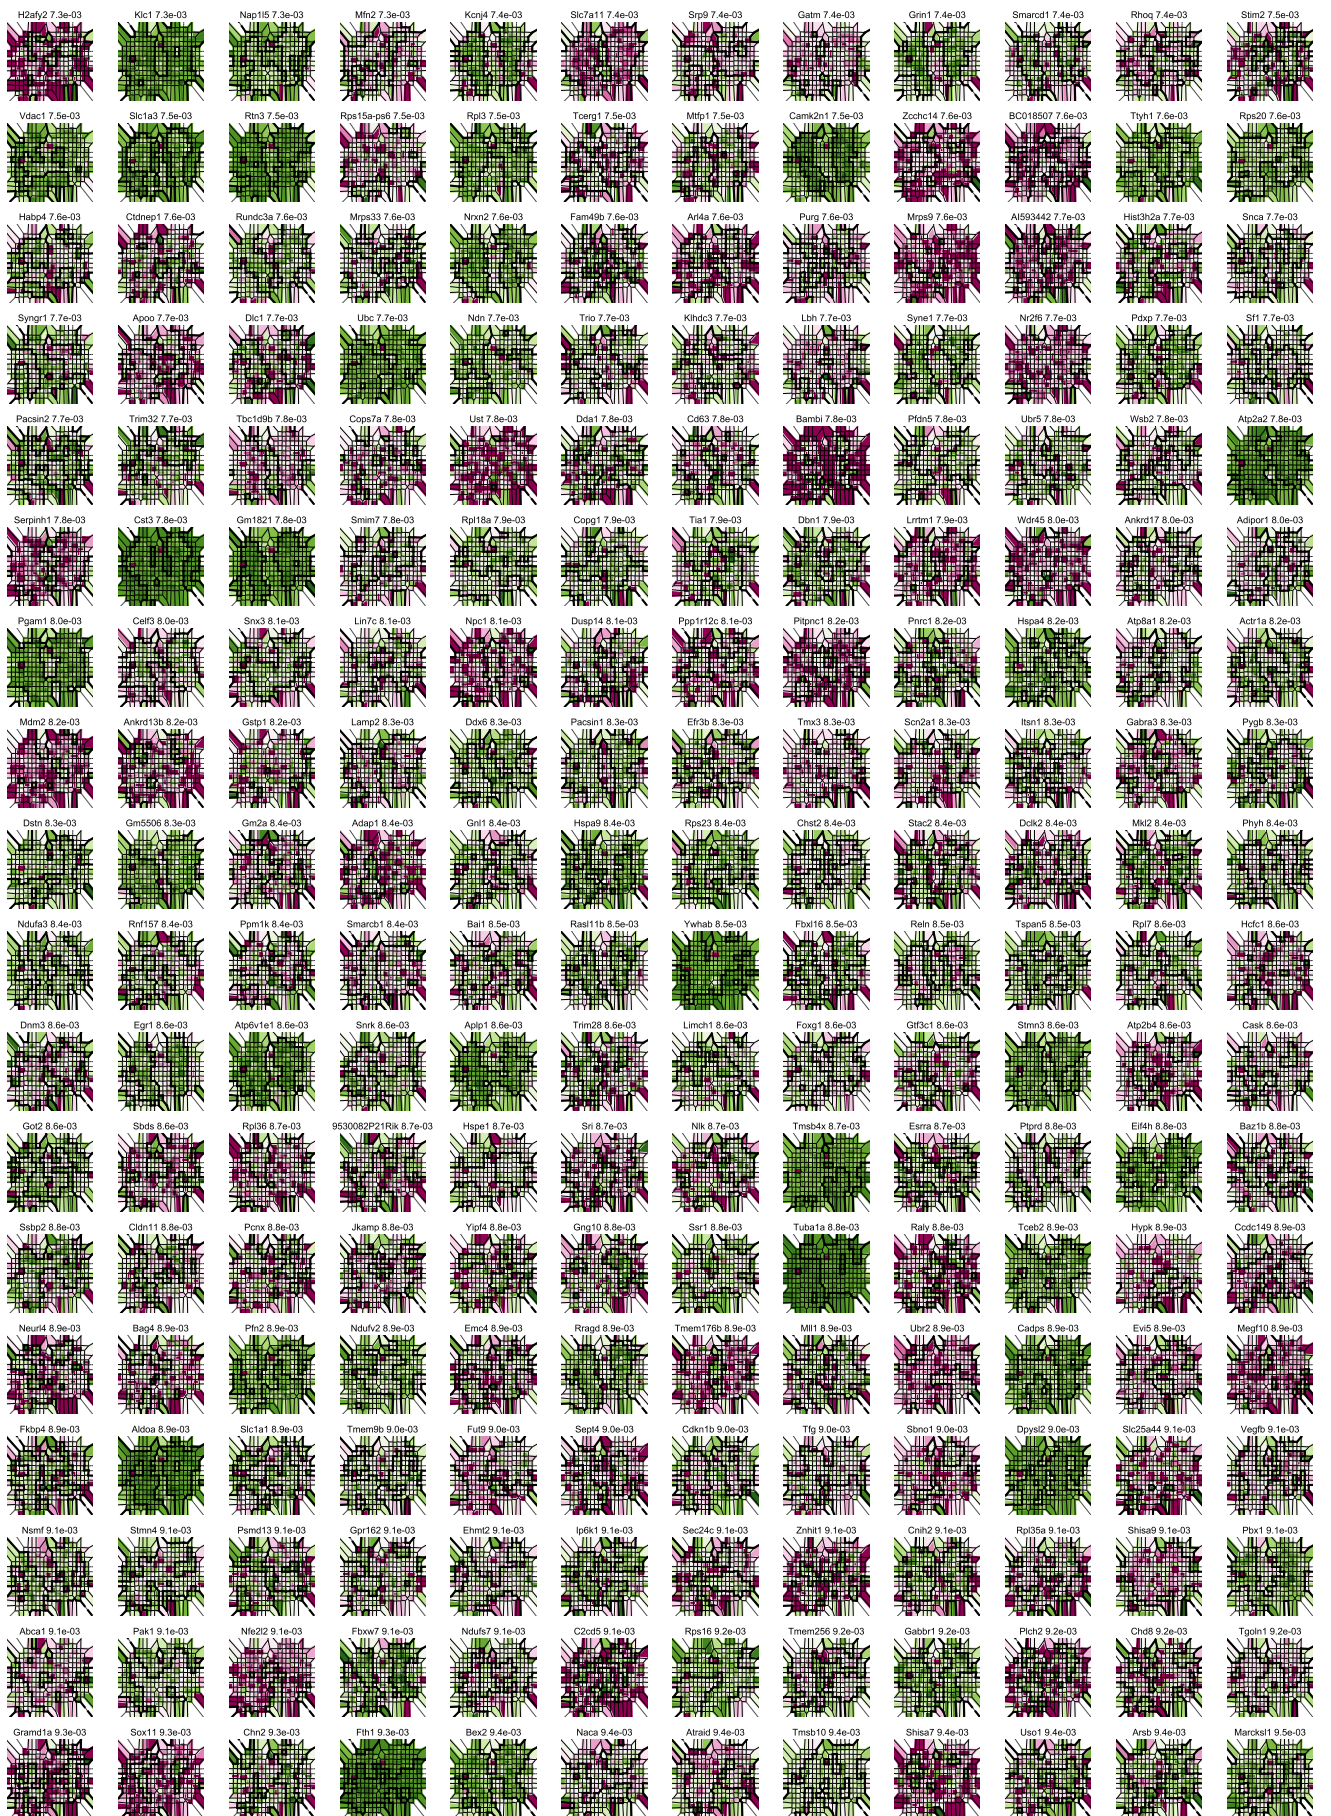

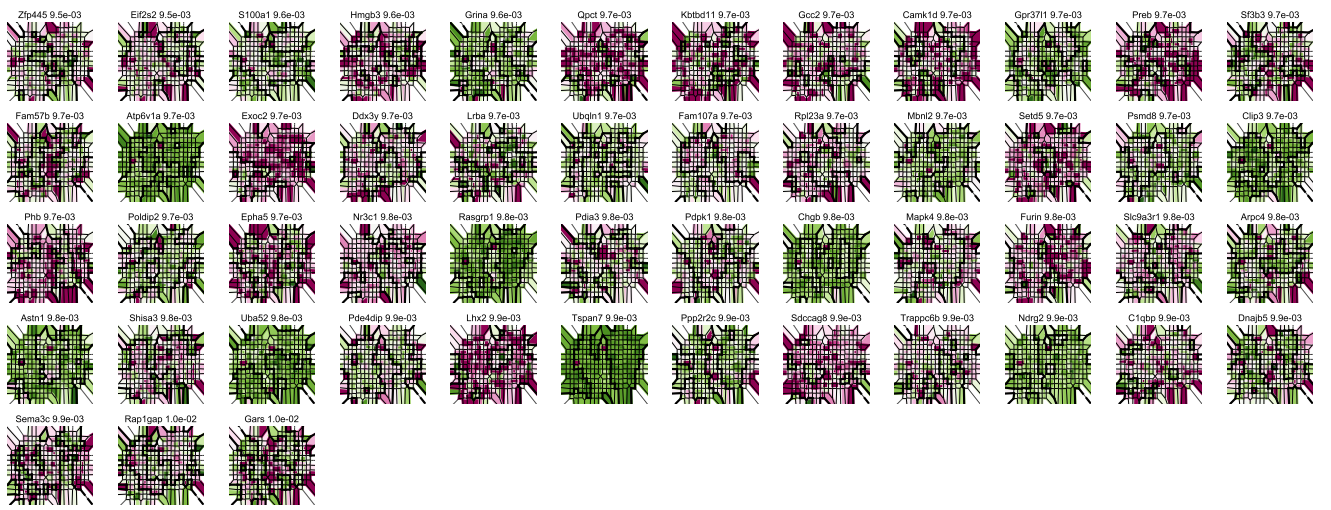

Supplement: Supplementary file [file media-2.pdf]
